# Supplementary material
Source: MDPI journal article supplement (https://www.mdpi.com/2673-8007/2/3/51)
Supplement: s1 [file s1 › applmicrobiol-1811852-supplementary.pdf]

# Interactions Between Microbial Communities and Naturally Occurring Radionuclides in Soilless Growth Media Amended with Different Concentrations of Biochar

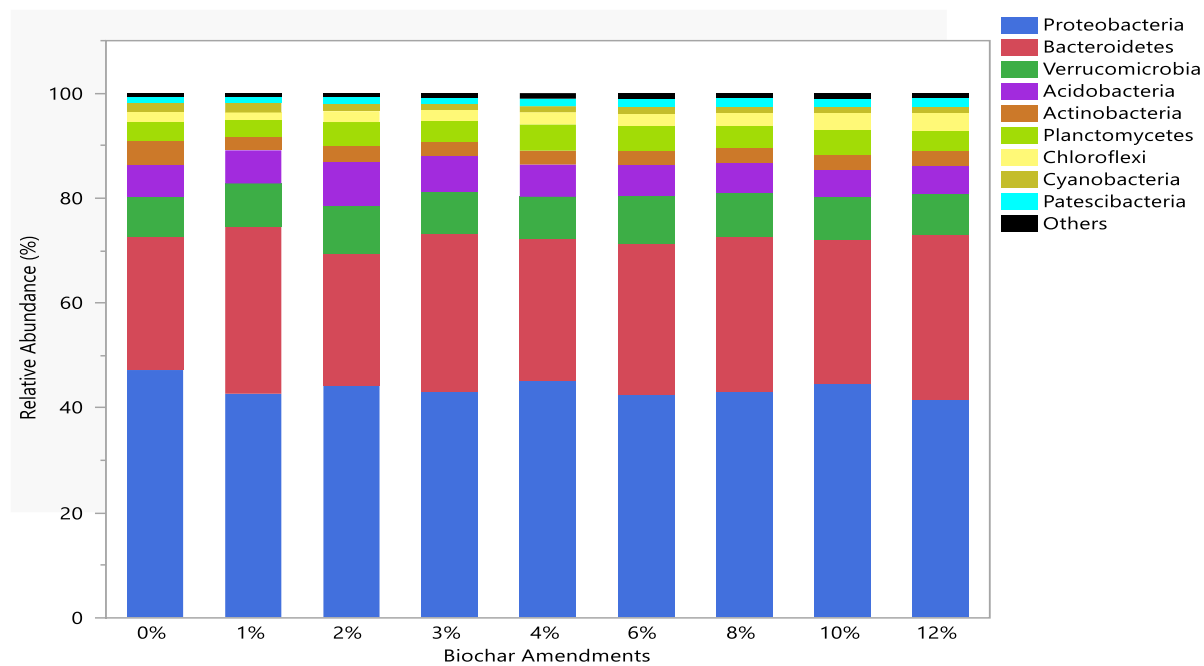

**Figure S1:** Relative abundance of dominant bacteria phyla as detected in different % biochar amended soilless growth media

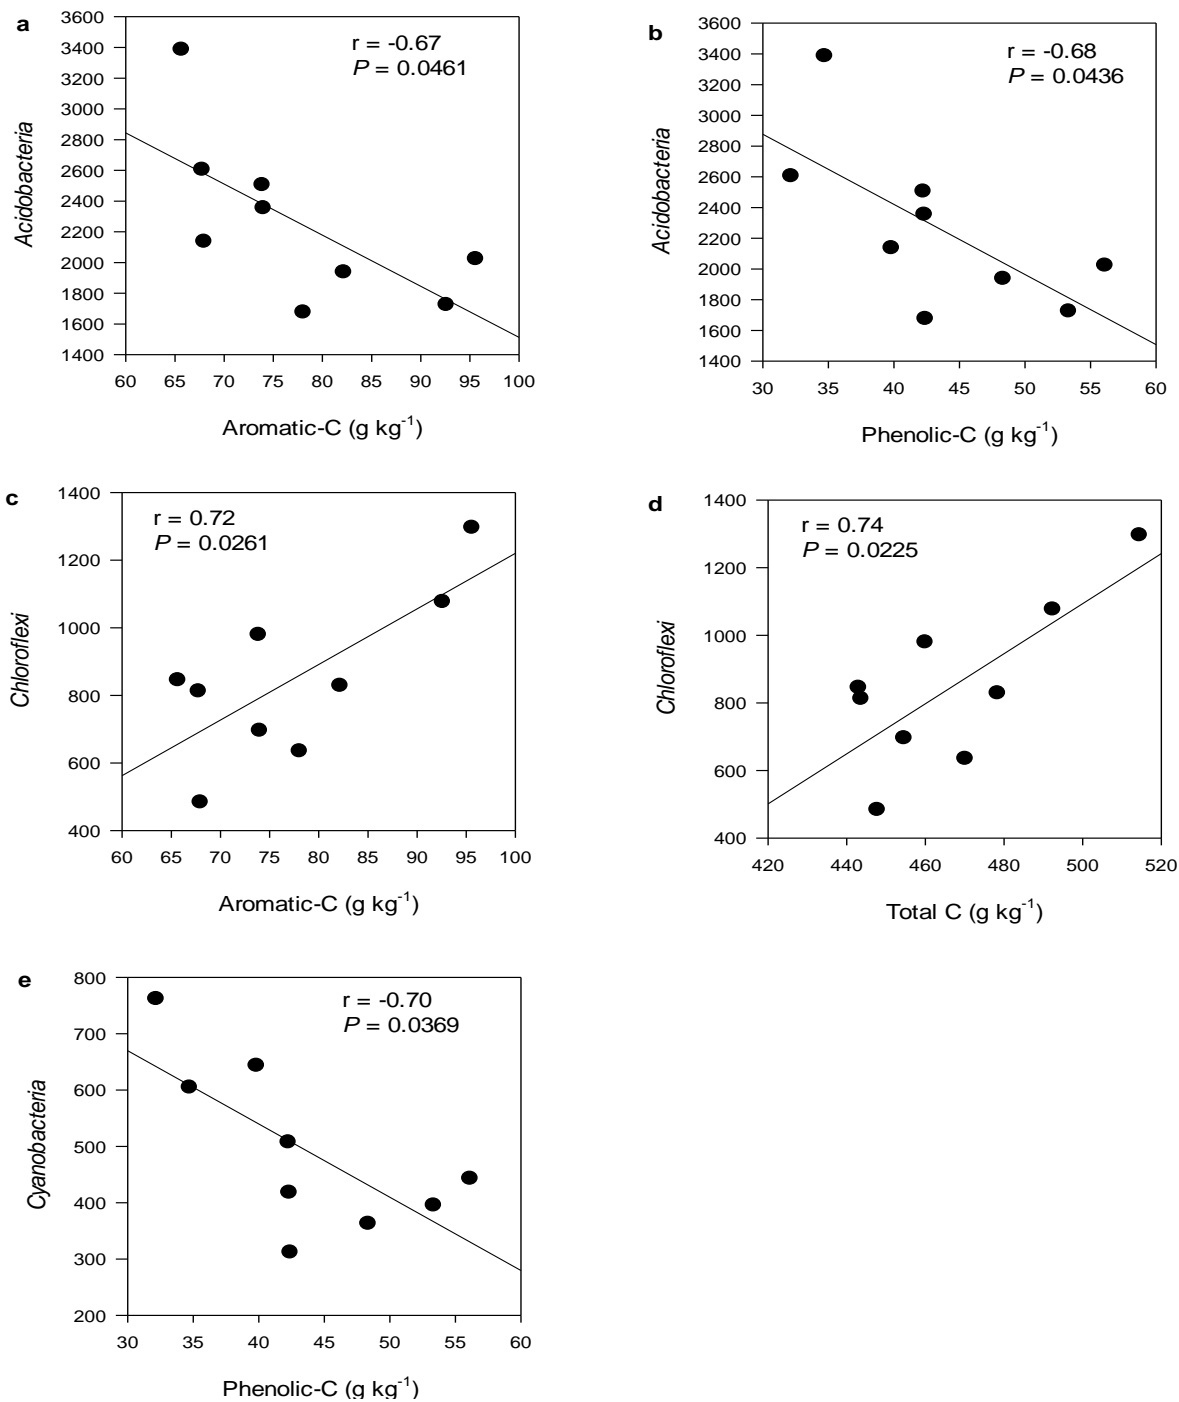

**Figure S2:** Carbon composition relationships with bacteria phyla. *a* and *b* represent correlation between aromatic and phenolic-C, and *Acidobacteria*, *c*, and *d* is the relationship between aromatic-C and total carbon (TC) and *Chloroflexi*, while *e* shows the relationship between phenolic-C and *Cyanobacteria*

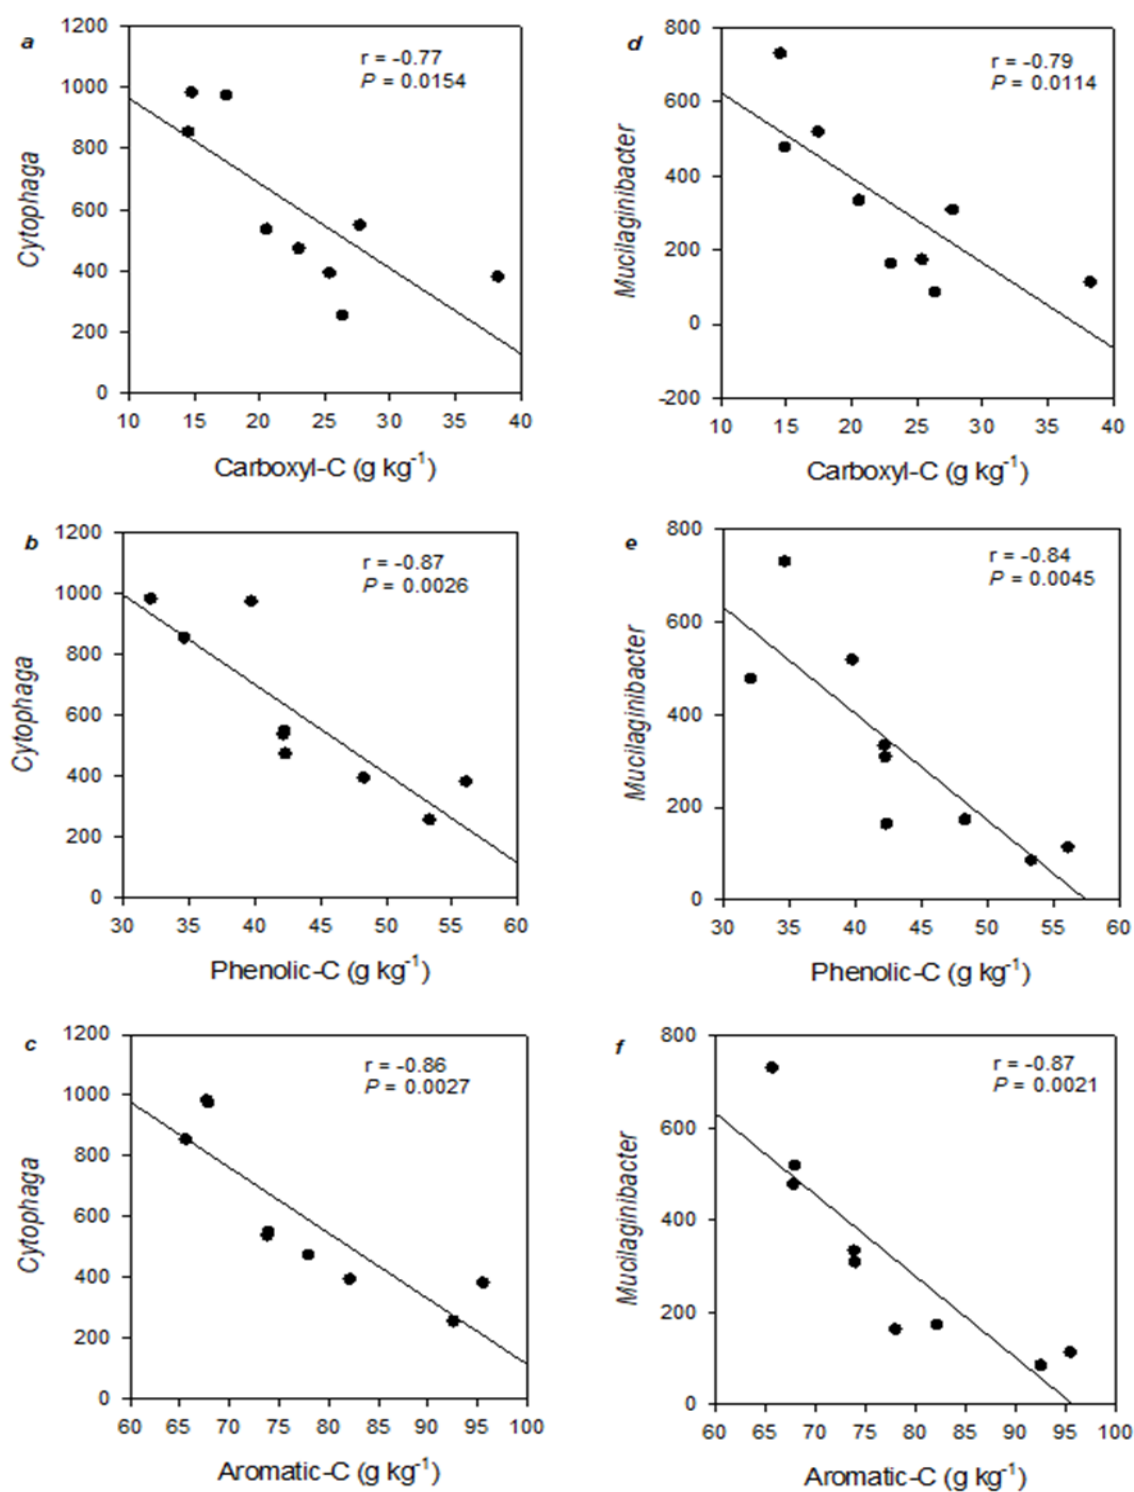

**Figure S3:** Carbon composition relationships with bacteria phyla. *Cytophaga* with (a) carboxyl-C, (b) phenolic-C, and (c) aromatic-C. and *Mucilaginibacter* with (a) carboxyl-C, (b) phenolic-C, and (c) aromatic-C

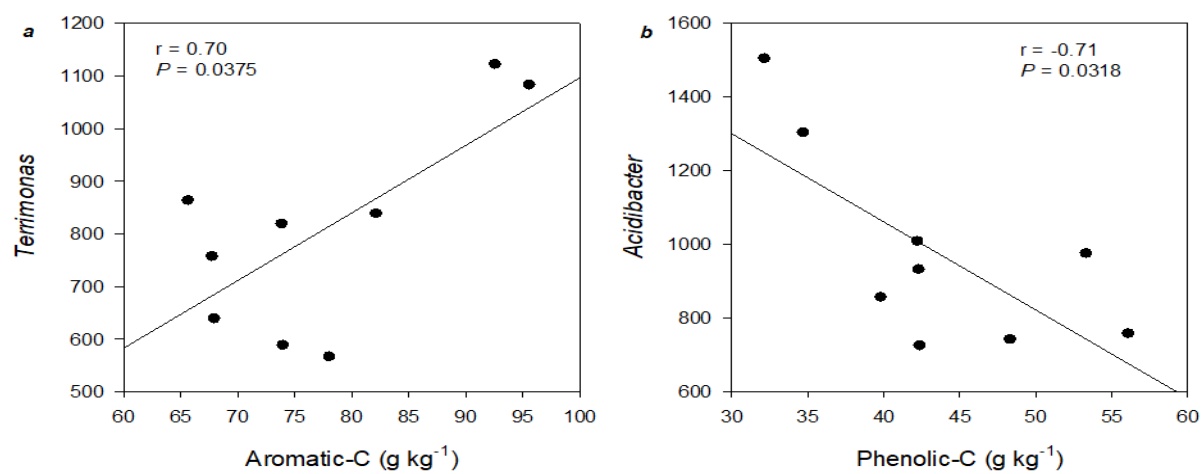

**Figure S4:** (a) Aromatic-C relationship with *Terrimonas* and (b) phenolic-C relationship with *Acidibacter*

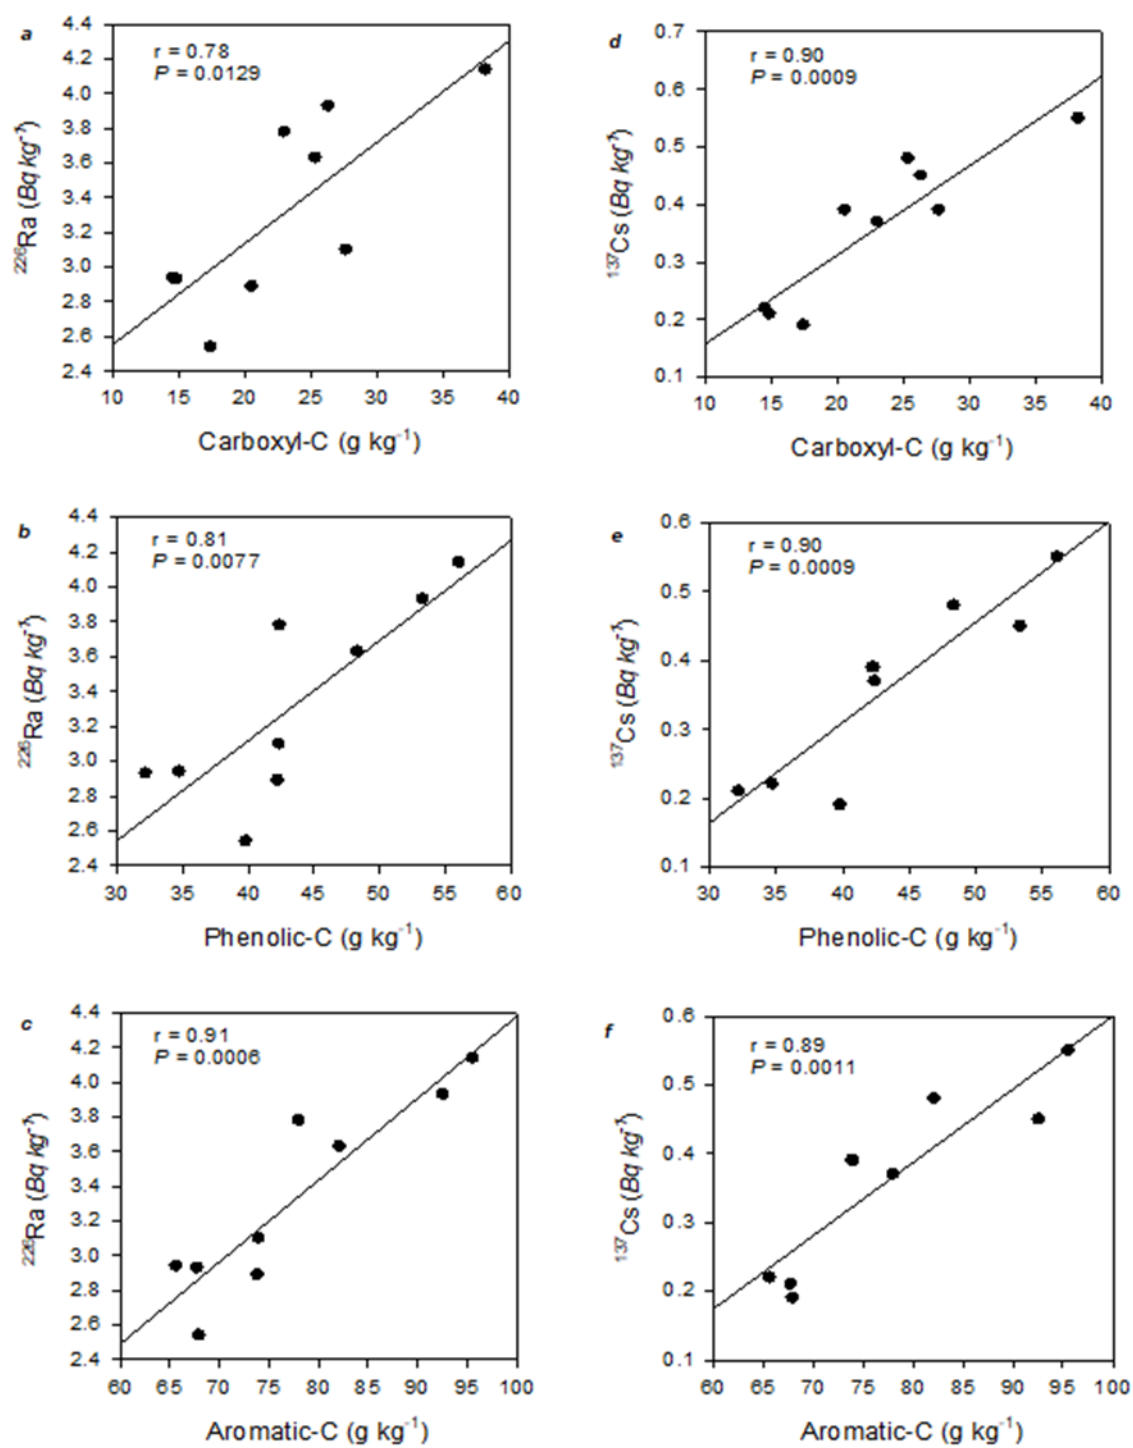

**Figure S5:** Relationships of C composition with radionuclides  $^{226}\text{Ra}$  and  $^{137}\text{Cs}$

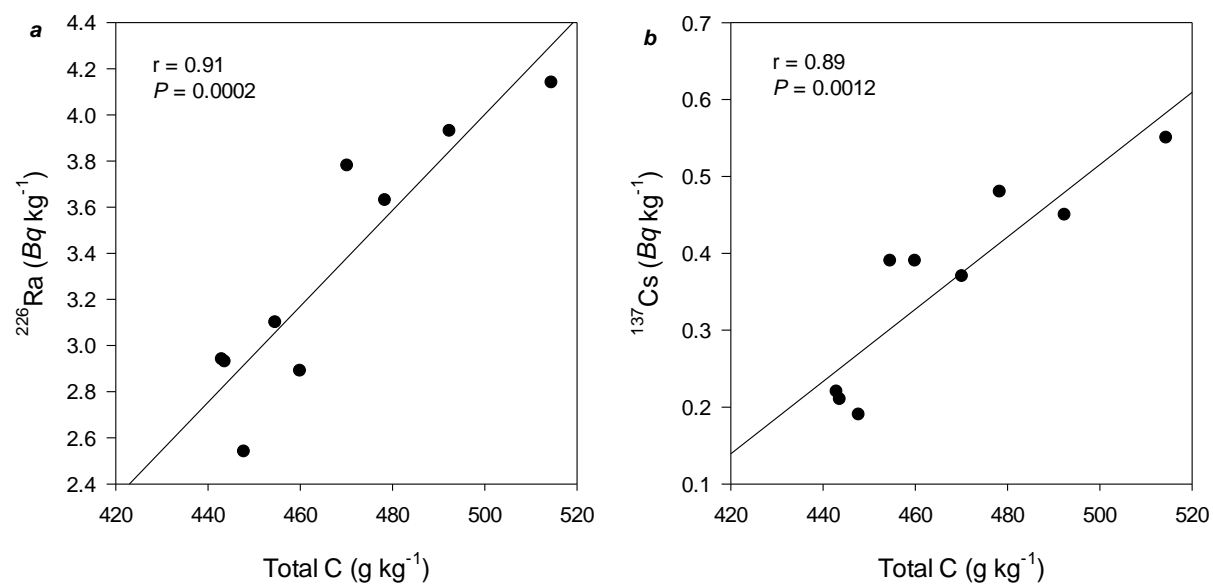

**Figure S6:** Relationship between total C and (a)  $^{226}\text{Ra}$  and (b)  $^{137}\text{Cs}$

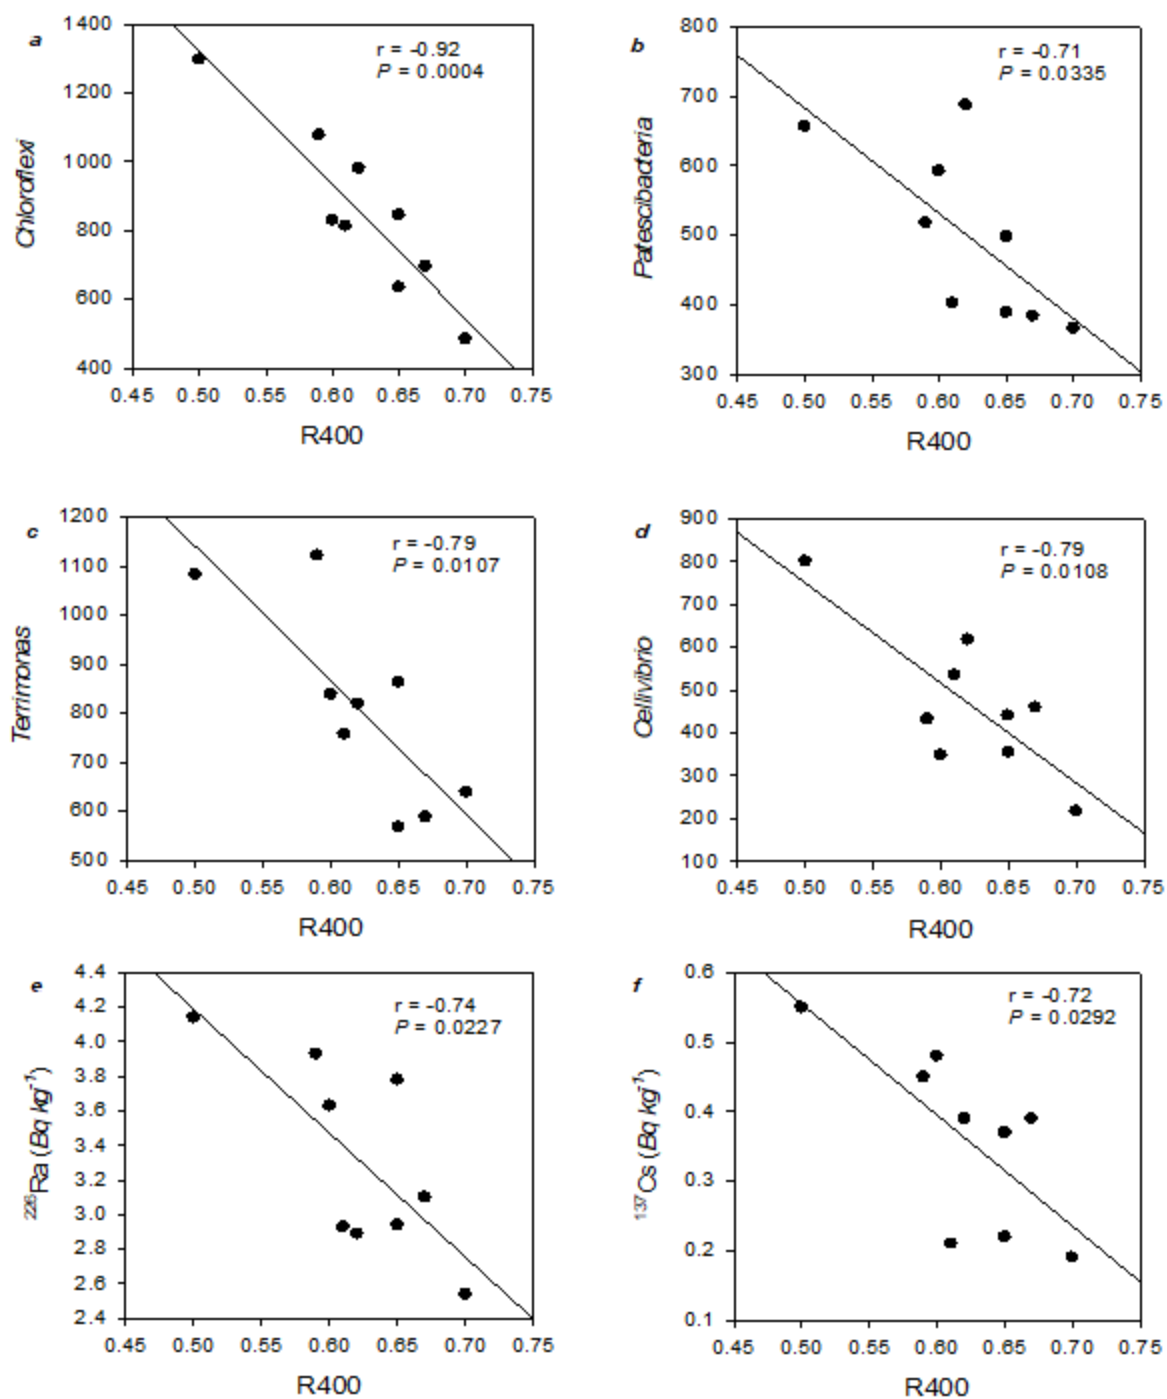

**Figure S7:** R400 relationships with bacteria phyla: (a) *Chloroflexi* and (b) *Patescibacteria*, bacteria genera: (c) *Terrimonas* and (d) *Cellvibrio*, and radionuclides: (e)  $^{226}\text{Ra}$  and (f)  $^{137}\text{Cs}$
